# Supplementary material for: Haeckelite phosphorus: an emerging 2D allotrope of phosphorus for potential use in LIBs/SIBs
Source: Royal Society of Chemistry journal article supplement (doi:10.1039/d1cp03662a), 2021-01-01
Supplement: d1cp03662a1.pdf [file d1cp03662a1.pdf]

Supporting Information

**Haeckelite Phosphorous: An Emerging 2D Allotrope of Phosphorous for  
Potential Use in LIBs/SIBs**

Gayatree Barik<sup>1</sup> and Sourav Pal<sup>1,2\*</sup>

<sup>1</sup>Department of Chemistry, Indian Institute of Technology Bombay, Mumbai-400 076, India

<sup>2</sup>Department of Chemical Sciences, Indian Institute of Science Education and Research  
Kolkata, Mohanpur-741 246, India

Email: [s.pal@iiserkol.ac.in](mailto:s.pal@iiserkol.ac.in)

**Fig. S1:** Top and side view of the (a) octagonal unit cell of HaeckP and (b) Optimized geometry of a  $2 \times 2$  supercell of Haeck-P.

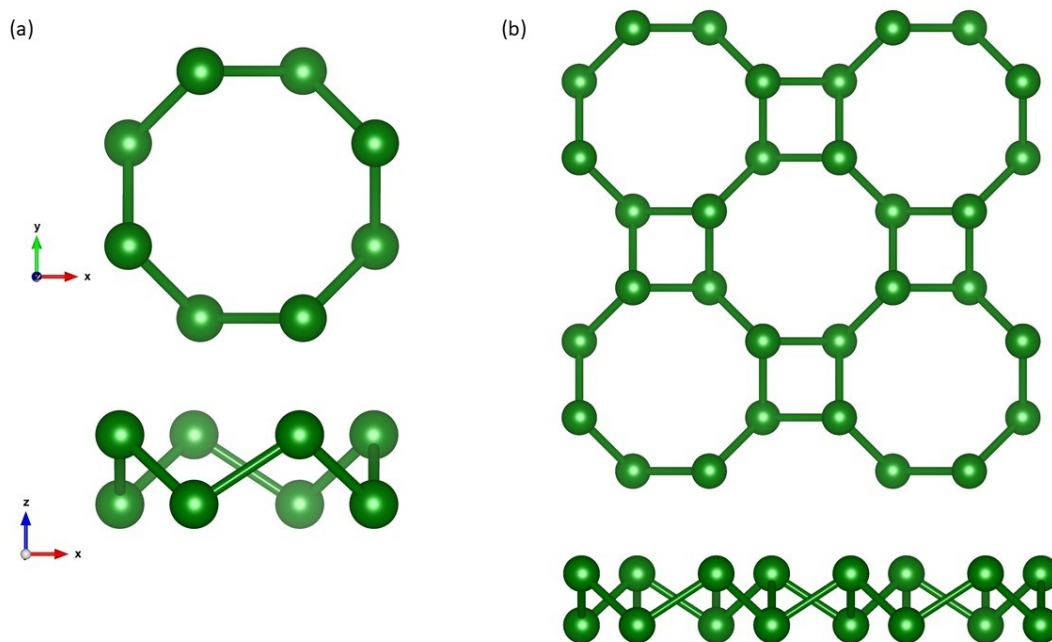

**Fig. S2:** (a) The relationship between the bandgap values and the number of Haeck phosphorene layers. (b) The strain tunable bandgap properties of Haeck Phosphorous.

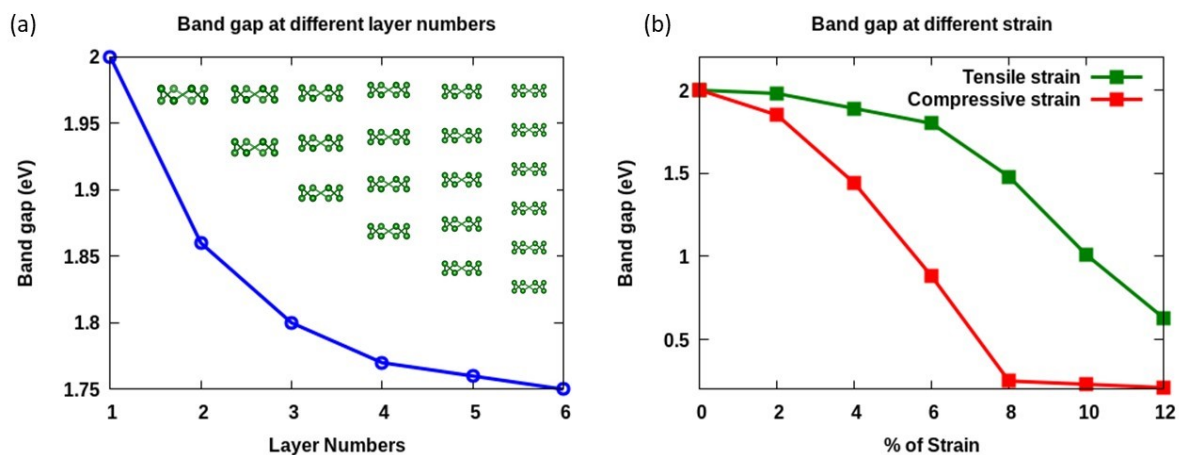

**Fig. S3:** The top and side views of possible Li (left) and Na (right) adsorption sites on the surface of HaeckP. (a) Li/Na adsorption on the top of the octagonal hollow position, (b) on the center of square hollow position, (c) Above the top of phosphorous. The green, purple and yellow balls represent P, Li, and Na atoms, respectively.

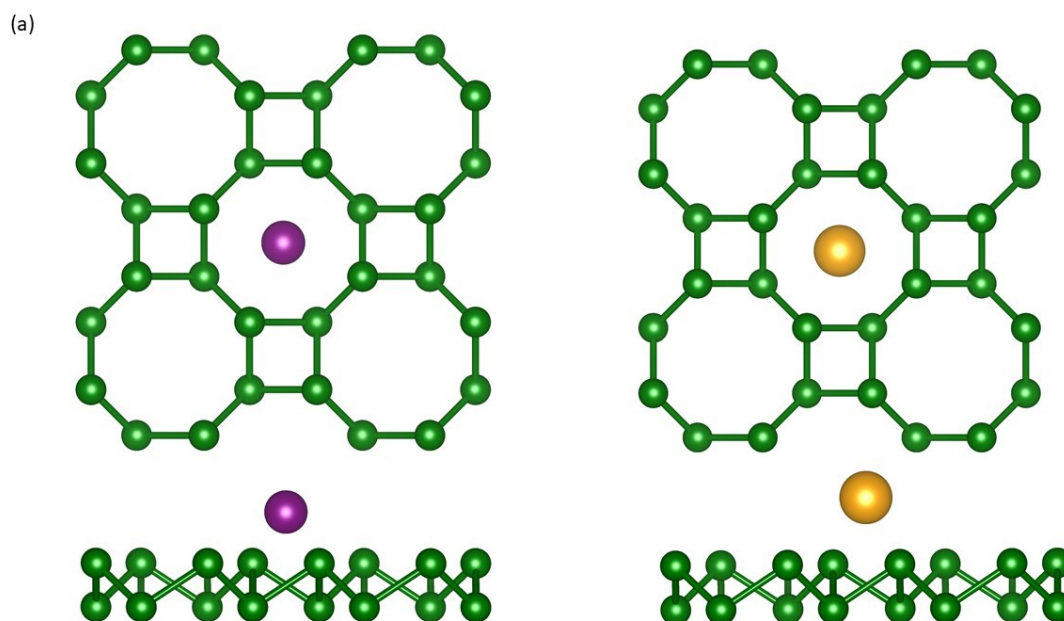

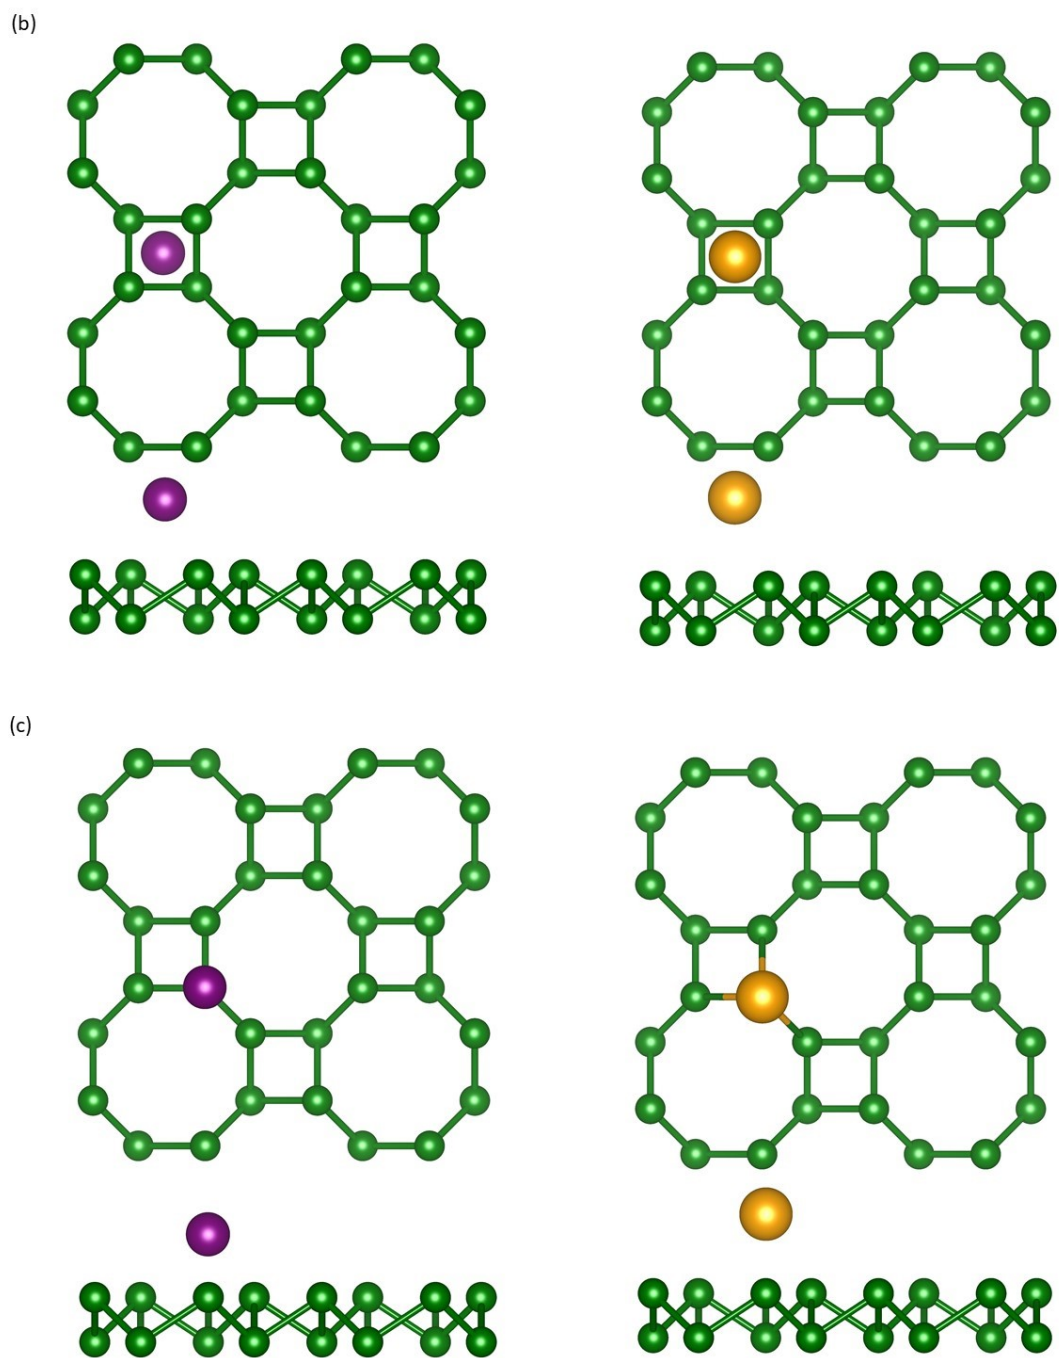

**Fig. S4:** Ab-initio molecular dynamics simulations. (a) 500K, and (b) Structure of Haeck P showing various bonds to distinguish the change in bond lengths and bond angles.

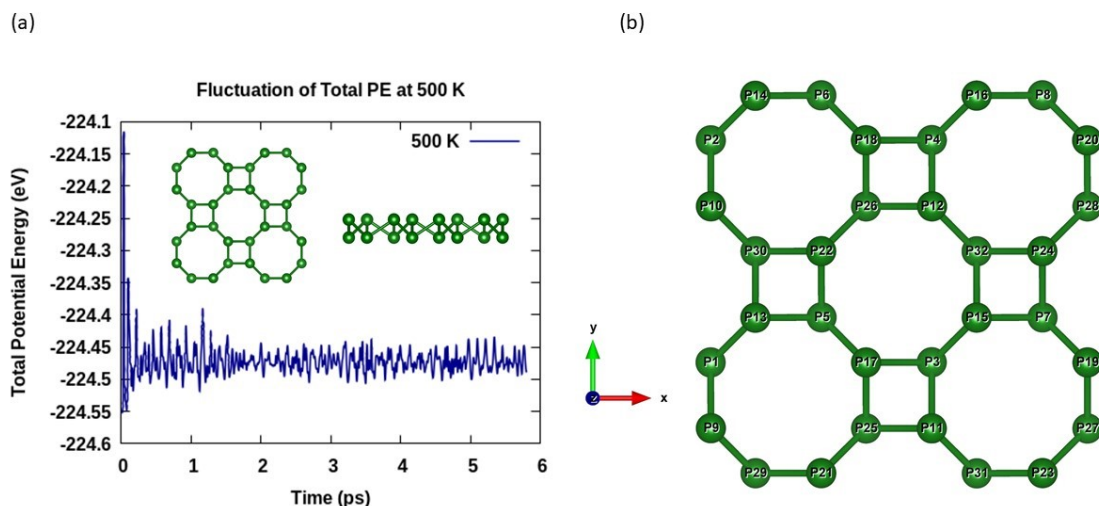

**Fig. S5.** Ab-initio molecular dynamics simulations at 300K and 500K under different stoichiometry. (a)  $\text{Li}_{0.5}\text{P}$  (b)  $\text{Na}_{0.5}\text{P}$  (c)  $\text{LiP}$  (d)  $\text{NaP}$

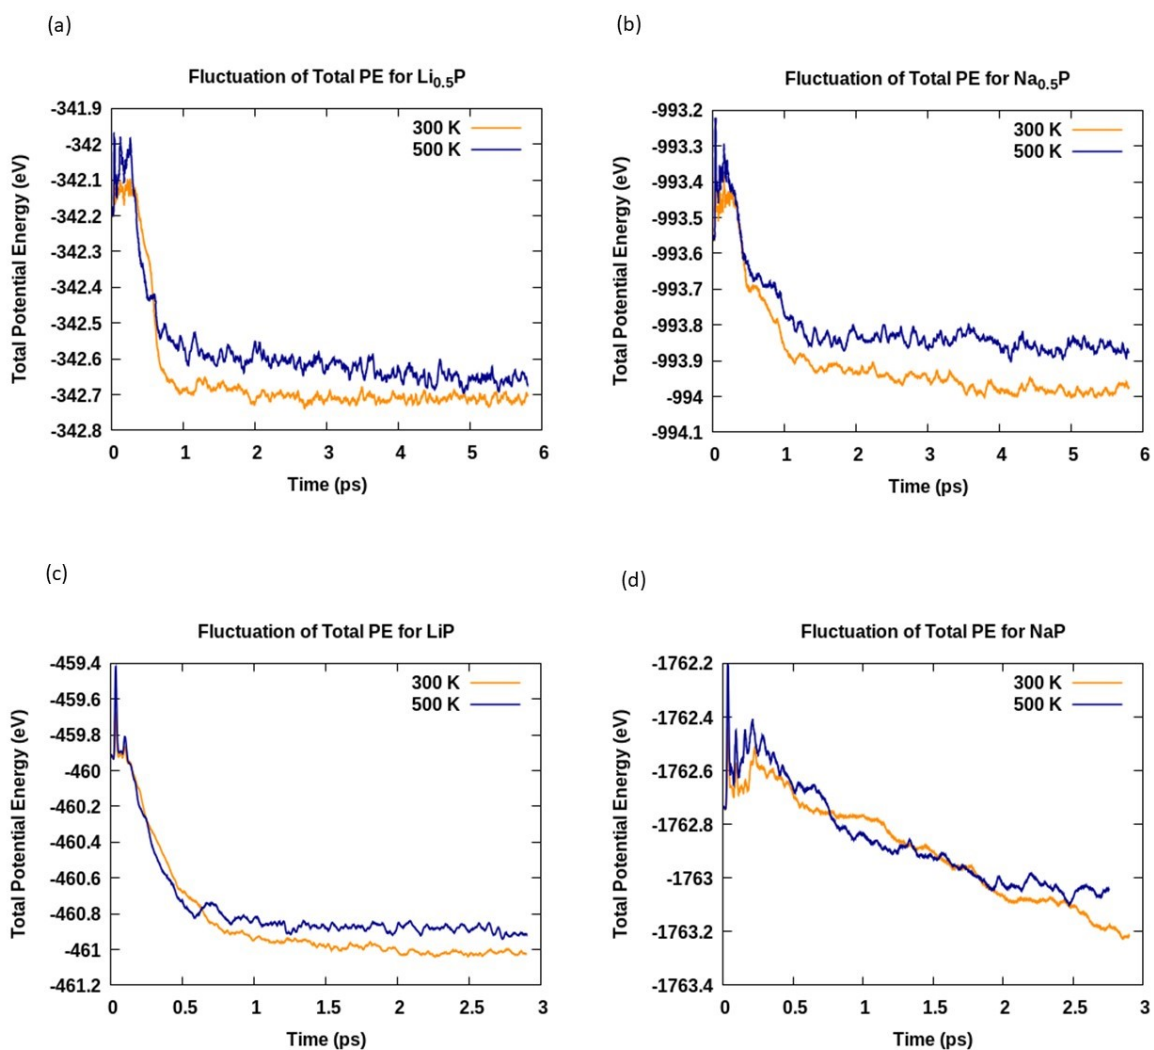

**Table S1:** Calculated Bandgap and thickness of few layers HeackP.

| Number of Layers | Bandgap (eV) | Thickness (Å) |
|------------------|--------------|---------------|
| 1                | 2.00         | 1.24          |
| 2                | 1.86         | 7.24          |
| 3                | 1.80         | 13.24         |
| 4                | 1.77         | 19.24         |
| 5                | 1.76         | 25.24         |
| 6                | 1.75         | 31.24         |

**Table S2:** Calculated structural and electronic properties of HeackP by the application of strain.

| % Of strain | Lattice constant (Å) | Thickness (Å) | Bandgap in eV (PBE) | Bandgap in eV (HSE06) |
|-------------|----------------------|---------------|---------------------|-----------------------|
| -12         | 5.68                 | 1.357         | 0.20                | -                     |
| -10         | 5.81                 | 1.336         | 0.23                | -                     |
| -8          | 5.94                 | 1.316         | 0.25                | 1.48                  |
| -6          | 6.07                 | 1.296         | 0.88                | 2.10                  |
| -4          | 6.20                 | 1.278         | 1.44                | 2.63                  |
| -2          | 6.33                 | 1.260         | 1.95                | 2.90                  |
| 0           | 6.46                 | 1.245         | 2.00                | 2.96                  |
| 2           | 6.59                 | 1.231         | 1.98                | 2.70                  |
| 4           | 6.72                 | 1.219         | 1.89                | 2.69                  |
| 6           | 6.84                 | 1.207         | 1.80                | 2.59                  |
| 8           | 6.97                 | 1.196         | 1.48                | 2.47                  |
| 10          | 7.10                 | 1.188         | 1.01                | -                     |
| 12          | 7.23                 | 1.181         | 0.63                | -                     |

**Table S3:** Calculated single Li/Na adsorption energies at the octagonal hollow position of Haeck P with different vdW corrections.

| Procedure | $E_{ad}$ in eV (Li) | $E_{ad}$ in eV (Na) |
|-----------|---------------------|---------------------|
| vdw-DF    | -1.77               | -1.31               |

|            |       |       |
|------------|-------|-------|
| vdw-DF2    | -1.83 | -1.29 |
| PBE        | -1.87 | -1.31 |
| PBE+D2     | -2.12 | -1.61 |
| PBE+D3     | -1.94 | -1.44 |
| PBE+D3-BJ  | -1.86 | -1.31 |
| PBE+TS     | -2.14 | -1.93 |
| PBE+TS+SCS | -1.93 | -1.21 |

**Table S4:** Calculated single Li/Na adsorption energies of multilayer Haeck P at the octagonal hollow position with vdw-DF2 functional.

| No of Layers | Adsorption location | $E_{ad}$ in eV (Li) | $E_{ad}$ in eV (Na) |
|--------------|---------------------|---------------------|---------------------|
| Bilayer      | interface           | -1.93               | -1.43               |
|              | surface             | -1.66               | -1.09               |
| Trilayer     | interface           | -1.97               | -1.49               |
|              | surface             | -1.65               | -1.09               |

**Table S5:** The change in bond lengths after the end of simulations at 300K.

| Bond    | Bond Length (Å) |
|---------|-----------------|---------|-----------------|---------|-----------------|---------|-----------------|
| P1-P9   | 2.288           | P30-P10 | 2.243           | P4-P16  | 2.231           | P15-P7  | 2.306           |
| P9-P29  | 2.234           | P10-P2  | 2.305           | P16-P8  | 2.297           | P15-P3  | 2.241           |
| P29-P21 | 2.299           | P2-P14  | 2.232           | P8-P20  | 2.236           | P3-P11  | 2.306           |
| P21-P25 | 2.241           | P14-P16 | 2.309           | P20-P28 | 2.295           | P11-P31 | 2.253           |
| P25-P17 | 2.298           | P6-P18  | 2.243           | P28-P24 | 2.244           | P31-P23 | 2.301           |
| P17-P5  | 2.235           | P18-P26 | 2.306           | P24-P32 | 2.300           | P23-P27 | 2.242           |
| P5-P13  | 2.308           | P26-P22 | 2.240           | P32-P12 | 2.241           | P27-P19 | 2.307           |
| P13-P30 | 2.314           | P26-P12 | 2.301           | P12-P26 | 2.301           | P19-P7  | 2.249           |
| P30-P22 | 2.302           | P12-P14 | 2.308           | P32-P15 | 2.314           | -       | -               |
| P22-P5  | 2.304           | P4-P18  | 2.309           | P24-P7  | 2.308           | -       | -               |

**Table S6:** The change in bond angles after the end of simulations at 300K.

| Bond        | Bond Angle (°) |
|-------------|----------------|-------------|----------------|-------------|----------------|-------------|----------------|
| P1-P9-P29   | 100.665        | P27-P19-P7  | 99.965         | P20-P8-P16  | 100.271        | P14-P2-P10  | 99.680         |
| P9-P29-P21  | 100.166        | P19-P7-P15  | 99.868         | P8-P16-P4   | 100.570        | P2-P10-P30  | 99.921         |
| P29-P21-P25 | 100.109        | P19-P7-P24  | 100.141        | P16-P4-P12  | 99.928         | P10-P30-P22 | 99.673         |
| P21-P25-P17 | 99.982         | P7-P15-P3   | 100.109        | P16-P4-P18  | 100.180        | P10-P30-P13 | 100.061        |
| P21-P25-P11 | 100.020        | P15-P3-P17  | 100.334        | P4-P12-P32  | 100.240        | P30-P13-P1  | 100.222        |
| P25-P11-P3  | 72.270         | P7-P15-P32  | 72.132         | P12-P32-P24 | 99.773         | P13-P1-P9   | 100.095        |
| P25-P17-P3  | 72.270         | P15-P32-P24 | 72.259         | P12-P26-P22 | 100.393        | P30-P13-P5  | 72.229         |
| P17-P3-P11  | 72.276         | P32-P24-P7  | 72.339         | P12-P26-P18 | 72.56          | P13-P5-P22  | 72.529         |
| P11-P25-P17 | 72.335         | P24-P7-P15  | 72.265         | P12-P4-P18  | 72.385         | P5-P22-P30  | 72.498         |
| P5-P11-P31  | 99.936         | P7-P24-P28  | 100.053        | P4-P18-P26  | 72.269         | P22-P30-P13 | 72.469         |
| P11-P31-P23 | 99.90          | P24-P32-P12 | 99.773         | P26-P12-P4  | 72.357         | -           | -              |
| P31-P23-P27 | 100.157        | P24-P28-P20 | 100.119        | P18-P6-P14  | 99.628         | -           | -              |
| P23-P27-P19 | 99.710         | P28-P20-P8  | 100.701        | P16-P14-P2  | 100.094        | -           | -              |

### Atomic coordinates of various Li/Na Concentrations:

#### 1. $Li_{0.5}P$

48

```

P 0.94984473 4.17852631 9.37322187
P 0.94984473 10.63852386 9.37322187
P 7.40984231 4.17852631 9.37322187
P 7.40984231 10.63852386 9.37322187
P 4.17916977 5.51088125 9.37335941
P 4.17916977 11.97087880 9.37335941
P 10.63916733 5.51088125 9.37335941
P 10.63916733 11.97087880 9.37335941
P 0.94922505 2.28125290 10.61841765
P 0.94922505 8.74125045 10.61841765
P 7.40922259 2.28125290 10.61841765
P 7.40922259 8.74125045 10.61841765
P 2.28175074 5.50987596 10.61839643
P 2.28175074 11.96987351 10.61839643

```

|    |             |             |             |
|----|-------------|-------------|-------------|
| P  | 8.74174828  | 5.50987596  | 10.61839643 |
| P  | 8.74174828  | 11.96987351 | 10.61839643 |
| P  | 5.51077251  | 4.17902800  | 10.61838259 |
| P  | 5.51077251  | 10.63902553 | 10.61838259 |
| P  | 11.97077006 | 4.17902800  | 10.61838259 |
| P  | 11.97077006 | 10.63902553 | 10.61838259 |
| P  | 4.17811564  | 0.95011711  | 10.61832215 |
| P  | 4.17811564  | 7.41011466  | 10.61832215 |
| P  | 10.63811320 | 0.95011711  | 10.61832215 |
| P  | 10.63811320 | 7.41011466  | 10.61832215 |
| P  | 5.51012721  | 2.28167223  | 9.37331331  |
| P  | 5.51012721  | 8.74166979  | 9.37331331  |
| P  | 11.97012477 | 2.28167223  | 9.37331331  |
| P  | 11.97012477 | 8.74166979  | 9.37331331  |
| P  | 2.28061305  | 0.94911630  | 9.37342215  |
| P  | 2.28061305  | 7.40911387  | 9.37342215  |
| P  | 8.74061061  | 0.94911630  | 9.37342215  |
| P  | 8.74061061  | 7.40911387  | 9.37342215  |
| Li | 2.13938403  | 1.08557778  | 12.41188647 |
| Li | 2.13880353  | 7.53955452  | 12.41182033 |
| Li | 8.61851935  | 1.08673298  | 12.41055975 |
| Li | 8.61744163  | 7.54055317  | 12.40974247 |
| Li | 2.14106288  | 5.38145729  | 7.58768244  |
| Li | 2.14118788  | 11.83585460 | 7.58706276  |
| Li | 8.61899889  | 5.38057011  | 7.58823262  |
| Li | 8.62034908  | 11.83443073 | 7.58834178  |
| Li | 4.30253515  | 5.37952098  | 12.40979537 |
| Li | 4.30142022  | 11.83336764 | 12.41065863 |
| Li | 10.78109048 | 5.38057136  | 12.41190751 |
| Li | 10.78056479 | 11.83448498 | 12.41199699 |
| Li | 4.29960202  | 1.08566274  | 7.58850840  |
| Li | 4.30096734  | 7.53960823  | 7.58836218  |
| Li | 10.77871417 | 1.08423144  | 7.58715420  |
| Li | 10.77882275 | 7.53866306  | 7.58773592  |

## 2. $Na_{0.5}P$

48

|   |             |             |             |
|---|-------------|-------------|-------------|
| P | 0.96422834  | 4.16748037  | 9.88609365  |
| P | 0.96422133  | 10.56247992 | 9.88612412  |
| P | 7.35921242  | 4.16747379  | 9.88609749  |
| P | 7.35921755  | 10.56248688 | 9.88612370  |
| P | 4.16136978  | 5.43444955  | 9.86117432  |
| P | 4.16137550  | 11.82948961 | 9.86119015  |
| P | 10.55637710 | 5.43444773  | 9.86118364  |
| P | 10.55637713 | 11.82949220 | 9.86118591  |
| P | 0.96370127  | 2.22526586  | 11.11481918 |
| P | 0.96370758  | 8.62021571  | 11.11478356 |
| P | 7.35869809  | 2.22525922  | 11.11481515 |
| P | 7.35869036  | 8.62022237  | 11.11477855 |
| P | 2.23481782  | 5.43271086  | 11.13531413 |
| P | 2.23481525  | 11.82775071 | 11.13531110 |
| P | 8.62981382  | 5.43271041  | 11.13530568 |
| P | 8.62981470  | 11.82775609 | 11.13531522 |
| P | 5.43117089  | 4.16967136  | 11.11151124 |
| P | 5.43117676  | 10.56467574 | 11.11148885 |
| P | 11.82618647 | 4.16966435  | 11.11151370 |



|    |             |             |             |
|----|-------------|-------------|-------------|
| P  | 11.82618053 | 10.56467998 | 11.11149186 |
| P  | 4.15981594  | 0.96231686  | 11.13520757 |
| P  | 4.15981433  | 7.35725003  | 11.13520073 |
| P  | 10.55481769 | 0.96231494  | 11.13521265 |
| P  | 10.55482030 | 7.35725138  | 11.13519472 |
| P  | 5.43039767  | 2.22752741  | 9.88589589  |
| P  | 5.43039284  | 8.62247705  | 9.88591714  |
| P  | 11.82540034 | 2.22752265  | 9.88589369  |
| P  | 11.82540752 | 8.62248308  | 9.88591901  |
| P  | 2.23382644  | 0.96058560  | 9.86466687  |
| P  | 2.23382690  | 7.35551406  | 9.86465912  |
| P  | 8.62882622  | 0.96058078  | 9.86466051  |
| P  | 8.62882291  | 7.35551590  | 9.86466634  |
| Na | 4.46112683  | 5.17710445  | 13.75424553 |
| Na | 4.46109510  | 11.57197524 | 13.75416103 |
| Na | 10.85604747 | 5.17713601  | 13.75425265 |
| Na | 10.85608663 | 11.57194338 | 13.75418501 |
| Na | 1.93389091  | 1.21728125  | 13.75529398 |
| Na | 1.93386239  | 7.61249780  | 13.75528327 |
| Na | 8.32885883  | 1.21732025  | 13.75531397 |
| Na | 8.32890259  | 7.61245493  | 13.75529238 |
| Na | 1.93377566  | 5.17543819  | 7.24469487  |
| Na | 1.93381902  | 11.57031071 | 7.24477232  |
| Na | 8.32882751  | 5.17546978  | 7.24470033  |
| Na | 8.32878519  | 11.57027970 | 7.24475987  |
| Na | 4.46100522  | 1.21938084  | 7.24474737  |
| Na | 4.46103539  | 7.61460578  | 7.24478433  |
| Na | 10.85602447 | 1.21940744  | 7.24472830  |
| Na | 10.85597593 | 7.61455523  | 7.24477184  |

### 3. LiP

64

|   |             |             |             |
|---|-------------|-------------|-------------|
| P | 0.92444137  | 4.15508741  | 9.30597490  |
| P | 0.92762938  | 10.61442474 | 9.30309546  |
| P | 7.38713477  | 4.15404042  | 9.30457784  |
| P | 7.39070304  | 10.61282678 | 9.30117904  |
| P | 4.15824401  | 5.53081035  | 9.31485196  |
| P | 4.15905048  | 11.99314297 | 9.31769356  |
| P | 10.61650315 | 5.52768140  | 9.31155180  |
| P | 10.61775440 | 11.99037507 | 9.31425922  |
| P | 0.92620320  | 2.30513143  | 10.69718931 |
| P | 0.92323306  | 8.76393161  | 10.69371056 |
| P | 7.38945644  | 2.30625145  | 10.69975162 |
| P | 7.38581042  | 8.76481399  | 10.69547994 |
| P | 2.30403908  | 5.52627888  | 10.68769950 |
| P | 2.30266507  | 11.98917715 | 10.68607834 |
| P | 8.76266541  | 5.52943183  | 10.68502370 |
| P | 8.76168601  | 11.99185876 | 10.68316860 |
| P | 5.53407942  | 4.15503266  | 10.69513496 |
| P | 5.53052836  | 10.61350916 | 10.69890029 |
| P | 11.99676206 | 4.15587831  | 10.69263592 |
| P | 11.99358498 | 10.61492955 | 10.69642972 |
| P | 4.15837603  | 0.92805358  | 10.68304570 |
| P | 4.15740216  | 7.39032495  | 10.68411418 |
| P | 10.61736755 | 0.93083625  | 10.68500514 |
| P | 10.61589516 | 7.39347616  | 10.68696628 |
| P | 5.52916924  | 2.30694563  | 9.30078614  |

|    |             |             |             |
|----|-------------|-------------|-------------|
| P  | 5.53276143  | 8.76576926  | 9.30407452  |
| P  | 11.99253485 | 2.30553973  | 9.30184432  |
| P  | 11.99562533 | 8.76476311  | 9.30517722  |
| P  | 2.30223160  | 0.92950358  | 9.31515968  |
| P  | 2.30335503  | 7.39214167  | 9.31233234  |
| P  | 8.76065777  | 0.92685213  | 9.31793404  |
| P  | 8.76153487  | 7.38893495  | 9.31593242  |
| Li | 5.41014649  | 4.30477827  | 7.50865831  |
| Li | 5.42313323  | 10.80535833 | 7.50723719  |
| Li | 11.84086865 | 4.28958217  | 7.50071232  |
| Li | 11.84996620 | 10.78894619 | 7.49808296  |
| Li | 1.07003843  | 2.13062113  | 7.49813792  |
| Li | 1.07913138  | 8.63016037  | 7.50244695  |
| Li | 7.49675991  | 2.11436226  | 7.50801669  |
| Li | 7.50998232  | 8.61493233  | 7.50880559  |
| Li | 2.11610854  | 5.42330390  | 7.50731341  |
| Li | 2.13348632  | 11.85008377 | 7.49680726  |
| Li | 8.61608682  | 5.41042115  | 7.50807297  |
| Li | 8.63115026  | 11.84132347 | 7.50033167  |
| Li | 4.28868224  | 1.07836096  | 7.49967208  |
| Li | 4.30384627  | 7.50928618  | 7.50773967  |
| Li | 10.78629930 | 1.06976952  | 7.49613862  |
| Li | 10.80371989 | 7.49644266  | 7.50644605  |
| Li | 1.07936429  | 4.28952916  | 12.49955018 |
| Li | 1.07064862  | 10.78789521 | 12.50270346 |
| Li | 7.51083328  | 4.30453492  | 12.49215922 |
| Li | 7.49779370  | 10.80462408 | 12.49333188 |
| Li | 4.30453158  | 5.41110537  | 12.49064644 |
| Li | 4.28901730  | 11.84136360 | 12.49977276 |
| Li | 10.80495176 | 5.42404752  | 12.49212816 |
| Li | 10.78796866 | 11.85056086 | 12.50257836 |
| Li | 5.42214220  | 2.11506908  | 12.49287186 |
| Li | 5.40904051  | 8.61532762  | 12.49193032 |
| Li | 11.84931872 | 2.13171754  | 12.50233050 |
| Li | 11.84046797 | 8.63015728  | 12.49812586 |
| Li | 2.13200300  | 1.06927709  | 12.50385876 |
| Li | 2.11516930  | 7.49563389  | 12.49239068 |
| Li | 8.63107293  | 1.07826866  | 12.49955874 |
| Li | 8.61545752  | 7.50864575  | 12.49149530 |

#### 4. NaP

64

|   |             |             |             |
|---|-------------|-------------|-------------|
| P | 0.96780369  | 4.19584967  | 10.36823354 |
| P | 0.96780369  | 10.65584723 | 10.36823354 |
| P | 7.42780124  | 4.19584967  | 10.36823354 |
| P | 7.42780124  | 10.65584723 | 10.36823354 |
| P | 4.19703700  | 5.49371643  | 10.36818507 |
| P | 4.19703700  | 11.95371398 | 10.36818507 |
| P | 10.65703455 | 5.49371643  | 10.36818507 |
| P | 10.65703455 | 11.95371398 | 10.36818507 |
| P | 0.96625978  | 2.26308868  | 11.63331790 |
| P | 0.96625978  | 8.72308623  | 11.63331790 |
| P | 7.42625733  | 2.26308868  | 11.63331790 |
| P | 7.42625733  | 8.72308623  | 11.63331790 |
| P | 2.26399028  | 5.49242439  | 11.63289607 |
| P | 2.26399028  | 11.95242192 | 11.63289607 |

|    |             |             |             |
|----|-------------|-------------|-------------|
| P  | 8.72398783  | 5.49242439  | 11.63289607 |
| P  | 8.72398783  | 11.95242192 | 11.63289607 |
| P  | 5.49373777  | 4.19745143  | 11.63297586 |
| P  | 5.49373777  | 10.65744898 | 11.63297586 |
| P  | 11.95373532 | 4.19745143  | 11.63297586 |
| P  | 11.95373532 | 10.65744898 | 11.63297586 |
| P  | 4.19569794  | 0.96789252  | 11.63332657 |
| P  | 4.19569794  | 7.42789007  | 11.63332657 |
| P  | 10.65569549 | 0.96789252  | 11.63332657 |
| P  | 10.65569549 | 7.42789007  | 11.63332657 |
| P  | 5.49224571  | 2.26416113  | 10.36890324 |
| P  | 5.49224571  | 8.72415869  | 10.36890324 |
| P  | 11.95224325 | 2.26416113  | 10.36890324 |
| P  | 11.95224325 | 8.72415869  | 10.36890324 |
| P  | 2.26272351  | 0.96628112  | 10.36843420 |
| P  | 2.26272351  | 7.42627867  | 10.36843420 |
| P  | 8.72272106  | 0.96628112  | 10.36843420 |
| P  | 8.72272106  | 7.42627867  | 10.36843420 |
| Na | 5.17284181  | 4.52356336  | 7.37332148  |
| Na | 5.17284181  | 10.98356091 | 7.37332148  |
| Na | 11.63283936 | 4.52356336  | 7.37332148  |
| Na | 11.63283936 | 10.98356091 | 7.37332148  |
| Na | 1.28650542  | 1.93632978  | 7.37366842  |
| Na | 1.28650542  | 8.39632733  | 7.37366842  |
| Na | 7.74650297  | 1.93632978  | 7.37366842  |
| Na | 7.74650297  | 8.39632733  | 7.37366842  |
| Na | 1.93908050  | 5.17057380  | 7.37294128  |
| Na | 1.93908050  | 11.63057134 | 7.37294128  |
| Na | 8.39907805  | 5.17057380  | 7.37294128  |
| Na | 8.39907805  | 11.63057134 | 7.37294128  |
| Na | 4.52144586  | 1.29032374  | 7.37358427  |
| Na | 4.52144586  | 7.75032130  | 7.37358427  |
| Na | 10.98144341 | 1.29032374  | 7.37358427  |
| Na | 10.98144341 | 7.75032130  | 7.37358427  |
| Na | 1.28972865  | 4.52088331  | 14.62704550 |
| Na | 1.28972865  | 10.98088086 | 14.62704550 |
| Na | 7.74972620  | 4.52088331  | 14.62704550 |
| Na | 7.74972620  | 10.98088086 | 14.62704550 |
| Na | 4.52388484  | 5.17307716  | 14.62692529 |
| Na | 4.52388484  | 11.63307471 | 14.62692529 |
| Na | 10.98388239 | 5.17307716  | 14.62692529 |
| Na | 10.98388239 | 11.63307471 | 14.62692529 |
| Na | 5.16931456  | 1.93839274  | 14.62691737 |
| Na | 5.16931456  | 8.39839031  | 14.62691737 |
| Na | 11.62931211 | 1.93839274  | 14.62691737 |
| Na | 11.62931211 | 8.39839031  | 14.62691737 |
| Na | 1.93667966  | 1.28763187  | 14.62677030 |
| Na | 1.93667966  | 7.74762942  | 14.62677030 |
| Na | 8.39667720  | 1.28763187  | 14.62677030 |
| Na | 8.39667720  | 7.74762942  | 14.62677030 |

## 5. $Li_2P$

96

|   |            |             |             |
|---|------------|-------------|-------------|
| P | 0.93347081 | 4.16085031  | 11.81436570 |
| P | 0.93340335 | 10.61614382 | 11.81544325 |
| P | 7.39128886 | 4.16205667  | 11.81407260 |

|    |             |             |             |
|----|-------------|-------------|-------------|
| P  | 7.39110932  | 10.61707761 | 11.81517425 |
| P  | 4.16345588  | 5.53016740  | 11.81123192 |
| P  | 4.16225261  | 11.98841511 | 11.81099682 |
| P  | 10.61783284 | 5.53034199  | 11.81148494 |
| P  | 10.61682946 | 11.98844084 | 11.81147027 |
| P  | 0.93284454  | 2.30156582  | 13.18221282 |
| P  | 0.93298723  | 8.75674534  | 13.18250662 |
| P  | 7.39049217  | 2.30067254  | 13.18249532 |
| P  | 7.39078764  | 8.75572139  | 13.18287197 |
| P  | 2.30263093  | 5.52824807  | 13.18253849 |
| P  | 2.30379381  | 11.98641769 | 13.18249707 |
| P  | 8.75699127  | 5.52812023  | 13.18341079 |
| P  | 8.75833497  | 11.98635014 | 13.18352249 |
| P  | 5.52931870  | 4.16413026  | 13.18041388 |
| P  | 5.52930532  | 10.61939639 | 13.17988103 |
| P  | 11.98715056 | 4.16303844  | 13.17957151 |
| P  | 11.98699760 | 10.61849940 | 13.17922063 |
| P  | 4.16224386  | 0.93382955  | 13.18172520 |
| P  | 4.16370469  | 7.39112264  | 13.18202759 |
| P  | 10.61690675 | 0.93372843  | 13.18133790 |
| P  | 10.61808434 | 7.39086814  | 13.18131240 |
| P  | 5.52980002  | 2.30253268  | 11.81360958 |
| P  | 5.52938254  | 8.75745417  | 11.81305773 |
| P  | 11.98703600 | 2.30342614  | 11.81370911 |
| P  | 11.98679942 | 8.75863584  | 11.81314536 |
| P  | 2.30297851  | 0.93163123  | 11.81411808 |
| P  | 2.30195695  | 7.38917344  | 11.81406123 |
| P  | 8.75775791  | 0.93155426  | 11.81398301 |
| P  | 8.75641568  | 7.38933518  | 11.81368686 |
| Li | 5.43293207  | 4.28353182  | 9.85377237  |
| Li | 5.42672676  | 10.69834252 | 9.85358889  |
| Li | 11.88596267 | 4.28199628  | 9.85299604  |
| Li | 11.87924135 | 10.69899976 | 9.85227045  |
| Li | 1.03784849  | 2.22011357  | 9.85262405  |
| Li | 1.03181316  | 8.63726901  | 9.85348184  |
| Li | 7.49310036  | 2.22094221  | 9.85380689  |
| Li | 7.48715082  | 8.63587970  | 9.85413994  |
| Li | 2.22135667  | 5.42633060  | 9.85395912  |
| Li | 2.22208294  | 11.87334726 | 9.85251372  |
| Li | 8.63627658  | 5.43220341  | 9.85415546  |
| Li | 8.63919793  | 11.87951437 | 9.85328422  |
| Li | 4.28053261  | 1.03860497  | 9.85308115  |
| Li | 4.28339313  | 7.48752950  | 9.85407099  |
| Li | 10.69757545 | 1.04512163  | 9.85224262  |
| Li | 10.69829060 | 7.49354319  | 9.85371177  |
| Li | 1.04092732  | 4.28164617  | 15.14468572 |
| Li | 1.04739340  | 10.69810946 | 15.14553197 |
| Li | 7.48815408  | 4.28393378  | 15.14379893 |
| Li | 7.49420055  | 10.69842203 | 15.14404730 |
| Li | 4.28457779  | 5.43208141  | 15.14355818 |
| Li | 4.28354723  | 11.88750368 | 15.14435882 |
| Li | 10.69947700 | 5.42616174  | 15.14370978 |
| Li | 10.70062368 | 11.88156326 | 15.14514007 |
| Li | 5.42581101  | 2.22154765  | 15.14401062 |
| Li | 5.43174181  | 8.63601257  | 15.14359418 |
| Li | 11.87756081 | 2.22152279  | 15.14534827 |
| Li | 11.88374524 | 8.63798641  | 15.14438097 |
| Li | 2.22059631  | 1.04156710  | 15.14560224 |

|    |             |             |             |
|----|-------------|-------------|-------------|
| Li | 2.22137774  | 7.49376927  | 15.14413330 |
| Li | 8.63731834  | 1.03500796  | 15.14486180 |
| Li | 8.63605411  | 7.48758696  | 15.14393425 |
| Li | 2.12341652  | 5.32833605  | 17.64678335 |
| Li | 2.11894018  | 11.81388126 | 17.64382261 |
| Li | 8.54179703  | 5.33040683  | 17.64903101 |
| Li | 8.53608263  | 11.81305200 | 17.64625338 |
| Li | 1.10488952  | 2.11840760  | 17.64390171 |
| Li | 1.10520211  | 8.53470598  | 17.64653572 |
| Li | 7.59161364  | 2.12307495  | 17.64670950 |
| Li | 7.58929847  | 8.54053370  | 17.64938539 |
| Li | 5.33074162  | 4.37936607  | 17.64943654 |
| Li | 5.32840980  | 10.79674002 | 17.64651275 |
| Li | 11.81602328 | 4.38518202  | 17.64653292 |
| Li | 11.81621049 | 10.80135557 | 17.64366679 |
| Li | 4.38451737  | 1.10620075  | 17.64653673 |
| Li | 4.37881111  | 7.58933917  | 17.64914349 |
| Li | 10.80133380 | 1.10577277  | 17.64388271 |
| Li | 10.79681503 | 7.59154571  | 17.64663500 |
| Li | 4.37884734  | 5.33035587  | 7.35047287  |
| Li | 4.38527591  | 11.81749074 | 7.35312911  |
| Li | 10.79725848 | 5.32806346  | 7.35295288  |
| Li | 10.80236394 | 11.81768126 | 7.35530752  |
| Li | 1.10592592  | 4.38345426  | 7.35313256  |
| Li | 1.10494869  | 10.80145390 | 7.35503165  |
| Li | 7.58994608  | 4.37753388  | 7.35061864  |
| Li | 7.59189114  | 10.79678225 | 7.35257704  |
| Li | 5.32803252  | 2.12299627  | 7.35259609  |
| Li | 5.33006788  | 8.54202360  | 7.35055185  |
| Li | 11.81637234 | 2.11811772  | 7.35494885  |
| Li | 11.81573539 | 8.53591896  | 7.35310278  |
| Li | 2.11776960  | 1.10165420  | 7.35536835  |
| Li | 2.12284819  | 7.59159886  | 7.35309321  |
| Li | 8.53494040  | 1.10191592  | 7.35297281  |
| Li | 8.54133746  | 7.58945824  | 7.35045682  |

## 6. $Na_2P$

96

|   |             |             |             |
|---|-------------|-------------|-------------|
| P | 0.97293911  | 4.20338599  | 12.86941168 |
| P | 0.97295616  | 10.66351802 | 12.86942113 |
| P | 7.43294304  | 4.20341405  | 12.86940639 |
| P | 7.43292013  | 10.66349628 | 12.86942161 |
| P | 4.20457332  | 5.48639478  | 12.85611842 |
| P | 4.20456395  | 11.94635938 | 12.85611270 |
| P | 10.66471261 | 5.48639016  | 12.85609580 |
| P | 10.66471883 | 11.94636507 | 12.85611329 |
| P | 0.97170470  | 2.25695264  | 14.14425350 |
| P | 0.97170917  | 8.71707421  | 14.14426144 |
| P | 7.43167082  | 2.25696208  | 14.14421991 |
| P | 7.43167351  | 8.71705978  | 14.14425774 |
| P | 2.25804273  | 5.48833044  | 14.13150316 |
| P | 2.25805958  | 11.94830098 | 14.13149493 |
| P | 8.71819267  | 5.48835312  | 14.13152500 |
| P | 8.71817657  | 11.94827361 | 14.13149382 |
| P | 5.48848857  | 4.20240634  | 14.11776082 |
| P | 5.48848121  | 10.66252215 | 14.11776365 |
| P | 11.94845002 | 4.20240717  | 14.11777013 |

P 11.94846390 10.66252034 14.11775706  
P 4.20044651 0.97203135 14.12949172  
P 4.20047101 7.43199782 14.12951186  
P 10.66061005 0.97204767 14.12950241  
P 10.66058677 7.43197991 14.12953362  
P 5.48587536 2.25726099 12.86799793  
P 5.48589277 8.71738632 12.86797668  
P 11.94588601 2.25727896 12.86798351  
P 11.94586019 8.71736876 12.86797031  
P 2.25483810 0.97319161 12.88191086  
P 2.25484213 7.43317212 12.88188786  
P 8.71498556 0.97319939 12.88191051  
P 8.71498045 7.43316959 12.88186396  
Na 5.26658672 4.42940936 10.14829778  
Na 5.26660056 10.88948097 10.14830782  
Na 11.72661286 4.42940795 10.14826317  
Na 11.72658986 10.88949678 10.14831630  
Na 1.19341366 2.02886381 10.15279274  
Na 1.19341338 8.48889817 10.15278061  
Na 7.65333856 2.02885054 10.15281504  
Na 7.65332925 8.48893104 10.15273277  
Na 2.03686705 5.25939883 10.15060182  
Na 2.03682233 11.71942390 10.15061187  
Na 8.49672334 5.25935952 10.15055430  
Na 8.49677447 11.71945453 10.15063201  
Na 4.42253634 1.19923564 10.15081807  
Na 4.42250028 7.65922081 10.15077255  
Na 10.88244664 1.19919375 10.15082376  
Na 10.88249991 7.65927094 10.15074311  
Na 1.19936025 4.42212087 16.85364997  
Na 1.19931781 10.88215034 16.85362467  
Na 7.65920726 4.42206460 16.85367105  
Na 7.65925950 10.88220042 16.85363585  
Na 4.42989641 5.26643401 16.85212347  
Na 4.42990136 11.72650275 16.85211302  
Na 10.88984629 5.26642455 16.85217563  
Na 10.88982555 11.72650350 16.85208651  
Na 5.26180910 2.03729608 16.85254043  
Na 5.26176741 8.49731546 16.85257696  
Na 11.72173778 2.03724314 16.85255037  
Na 11.72179300 8.49734968 16.85257837  
Na 2.03146928 1.19239907 16.85551337  
Na 2.03146190 7.65242825 16.85551407  
Na 8.49135045 1.19239849 16.85548343  
Na 8.49134577 7.65244511 16.85557596  
Na 2.03942404 5.26790673 20.12148583  
Na 2.03939970 11.72794102 20.12146755  
Na 8.49929172 5.26790007 20.12148936  
Na 8.49931406 11.72795242 20.12145516  
Na 1.19291418 2.03845094 20.12170396  
Na 1.19291551 8.49848211 20.12171328  
Na 7.65284670 2.03845471 20.12168009  
Na 7.65283766 8.49847365 20.12172151  
Na 5.27070447 4.42173146 20.11950176  
Na 5.27070624 10.88176984 20.11950646  
Na 11.73068213 4.42172623 20.11953281  
Na 11.73068335 10.88177702 20.11950821  
Na 4.42326658 1.19228608 20.12079017

|    |             |             |             |
|----|-------------|-------------|-------------|
| Na | 4.42324766  | 7.65227192  | 20.12082851 |
| Na | 10.88317423 | 1.19227105  | 20.12081450 |
| Na | 10.88318742 | 7.65228718  | 20.12084431 |
| Na | 4.42267273  | 5.26777702  | 6.87831294  |
| Na | 4.42267412  | 11.72781281 | 6.87832301  |
| Na | 10.88260947 | 5.26778225  | 6.87829374  |
| Na | 10.88261386 | 11.72782188 | 6.87832617  |
| Na | 1.19238179  | 4.41917906  | 6.87907218  |
| Na | 1.19236604  | 10.87920948 | 6.87908157  |
| Na | 7.65230310  | 4.41917952  | 6.87906319  |
| Na | 7.65231993  | 10.87922501 | 6.87907887  |
| Na | 5.26394804  | 2.03823779  | 6.87897125  |
| Na | 5.26393581  | 8.49823781  | 6.87894549  |
| Na | 11.72391653 | 2.03822818  | 6.87896037  |
| Na | 11.72393093 | 8.49826441  | 6.87893982  |
| Na | 2.03416050  | 1.18836594  | 6.88085955  |
| Na | 2.03416996  | 7.64837447  | 6.88085318  |
| Na | 8.49407045  | 1.18836460  | 6.88087812  |
| Na | 8.49406923  | 7.64837898  | 6.88082950  |
